# Supplementary material
Source: PubMed Central journal article supplement (PMC11466012)
Supplement: NIHMS2022679-supplement-SI_File.pdf [file NIHMS2022679-supplement-SI_File.pdf]

# Towards Sustainable and Humane Dairy Farming: A Low-cost Electrochemical Sensor for On-site Diagnosis of Milk Fever

Ali Soleimani, Farbod Amirghasemi, Abdulrahman Al-shami, Sina Khazaei Nejad, Alicia Tsung, Yuxuan Wang, Sandra Lara Galindo, Delaram Parvin, Amber Olson, Maral P.S. Mousavi

## 1 LIG Optimization

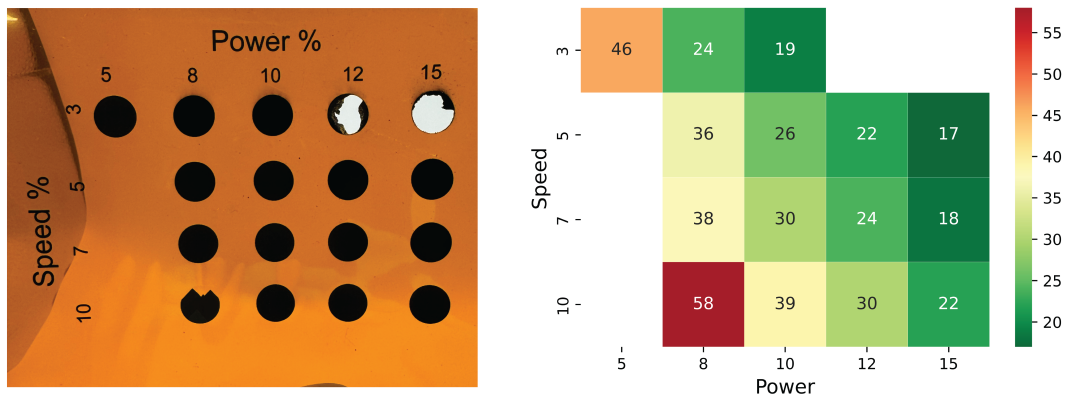

Figure 1: (A) Laser engraved graphene generated with different engraving speeds and laser powers. (B) Sheet resistance measurements for the LIGs under different engraving conditions.

## 2 Comparison

Table 1: Comparison between our LIG-based calcium sensor and other sensing methodologies used for calcium quantification

| <b>Ion to electron transducer</b>      | <b>Slope (mV/dec)</b> | <b>LOD (M)</b>         | <b>Linear range (M)</b>          | <b>Matrix</b>       | <b>Ref.</b>              |
|----------------------------------------|-----------------------|------------------------|----------------------------------|---------------------|--------------------------|
| Carbon paper                           | 29.80.2               | $3.3 \times 10^{-7}$   | $10^{-6}$ – $10^{-1}$            | Water               | Bouhoun et al. (2021)    |
| N-phenyl-ethylenediaminemethacrylamide | $30.2 \pm 0.5$        | $3.2 \times 10^{-6}$   | $10^{-7}$ – $10^{-2}$            | Serum               | Abramova et al. (2016)   |
| Vulcan carbon powder & DOS             | $28 \pm 2$            | $10^{-6}$              | $5 \times 10^{-6}$ – 0.2         | Artificial saliva   | Ummadi et al. (2016)     |
| Hollow carbon nanospheres              | 27.8                  | NA                     | $10^{-5}$ – 0.05                 | Rat brain           | Zhao et al. (2019)       |
| Carbon black modified LIG              | 30.1                  | $10^{-5}$              | $10^{-4}$ – $10^{-1}$            | Diluted humsn urine | Teekayupak et al. (2023) |
| Pre-treated conductive ceramic         | $26.7 \pm 1.3$        | $1.0 \times 10^{-6}$   | $10^{-5}$ – 0.1                  | Seawater            | Yin et al. (2019)        |
| Carbon Black                           | $26.3 \pm 0.5$        | $10^{-6}$              | NA                               | Water               | Mousavi et al. (2018)    |
| LIG                                    | $27.7 \pm 0.46$       | $15.16 \times 10^{-6}$ | $2.5 \times 10^{-6}$ – $10^{-2}$ | Bovine serum        | This Work                |

## References

- Abramova, N., Moral-Vico, J., Soley, J., Ocaña, C., Bratov, A., 2016. Solid contact ion sensor with conducting polymer layer copolymerized with the ion-selective membrane for determination of calcium in blood serum. *Analytica Chimica Acta* 943, 50–57.
- Bouhoun, M.L., Blondeau, P., Louafi, Y., Andrade, F.J., 2021. A paper-based potentiometric platform for determination of water hardness. *Chemosensors* 9. URL: <https://www.mdpi.com/2227-9040/9/5/96>, doi:10.3390/chemosensors9050096.
- Mousavi, M.P., Ainla, A., Tan, E.K., Abd El-Rahman, M.K., Yoshida, Y., Yuan, L., Sigurslid, H.H., Arkan, N., Yip, M.C., Abrahamsson, C.K., et al., 2018. Ion sensing with thread-based potentiometric electrodes. *Lab on a Chip* 18, 2279–2290.
- Teekayupak, K., Lomae, A., Agir, I., Chuaypen, N., Dissayabutra, T., Henry, C.S., Chailapakul, O., Ozer, T., Ruecha, N., 2023. Large-scale fabrication of ion-selective electrodes for simultaneous detection of  $\text{Na}^+$ ,  $\text{K}^+$ , and  $\text{Ca}^{2+}$  in biofluids using a smartphone-based potentiometric sensing platform. *Microchimica Acta* 190, 237.
- Ummadi, J.G., Downs, C.J., Joshi, V.S., Ferracane, J.L., Koley, D., 2016. Carbon-based solid-state calcium ion-selective microelectrode and scanning electrochemical microscopy: a quantitative study of pH-dependent release of calcium ions from bioactive glass. *Analytical chemistry* 88, 3218–3226.
- Yin, T., Yu, H., Ding, J., Qin, W., 2019. An integrated screen-printed potentiometric strip for determination of  $\text{Ca}^{2+}$  in seawater. *Journal of The Electrochemical Society* 166, B589.
- Zhao, L., Jiang, Y., Wei, H., Jiang, Y., Ma, W., Zheng, W., Cao, A.M., Mao, L., 2019. In vivo measurement of calcium ion with solid-state ion-selective electrode by using shelled hollow carbon nanospheres as a transducing layer. *Analytical chemistry* 91, 4421–4428.
